# Supplementary material for: Development of a Novel Anti-CD19 Chimeric Antigen Receptor: A Paradigm for an Affordable CAR T Cell Production at Academic Institutions
Source: PubMed Central journal article supplement (PMC6319086; doi:10.1016/j.omtm.2018.11.010), 2018-12-06
Supplement: mmc2.pdf [file mmc2.pdf]

# Development of a Novel Anti-CD19 Chimeric Antigen Receptor: A Paradigm for an Affordable CAR T Cell Production at Academic Institutions

Maria Castella,<sup>1,3,15</sup> Anna Boronat,<sup>2,3,15</sup> Raquel Martín-Ibáñez,<sup>4</sup> Vanina Rodríguez,<sup>3,5</sup> Guillermo Suñé,<sup>1,3</sup> Miguel Caballero,<sup>2,6</sup> Berta Marzal,<sup>2</sup> Lorena Pérez-Amill,<sup>1,3</sup> Beatriz Martín-Antonio,<sup>1,3</sup> Julio Castaño,<sup>7</sup> Clara Bueno,<sup>7</sup> Olga Balagué,<sup>8</sup> Europa Azucena González-Navarro,<sup>2</sup> Carles Serra-Pages,<sup>2,9</sup> Pablo Engel,<sup>2,3,14</sup> Ramon Vilella,<sup>2</sup> Daniel Benitez-Ribas,<sup>2,3</sup> Valentín Ortiz-Maldonado,<sup>1</sup> Joan Cid,<sup>3,10</sup> Jaime Tabera,<sup>11</sup> Josep M. Canals,<sup>3,4,9</sup> Miquel Lozano,<sup>3,10</sup> Tycho Baumann,<sup>1</sup> Anna Vilarrodona,<sup>11</sup> Esteve Trias,<sup>11</sup> Elías Campo,<sup>3,5,8,9,12</sup> Pablo Menendez,<sup>7,12,13</sup> Álvaro Urbano-Ispizua,<sup>1,3,7,9</sup> Jordi Yagüe,<sup>2,3,9</sup> Patricia Pérez-Galán,<sup>3,5,12</sup> Susana Rives,<sup>6</sup> Julio Delgado,<sup>1,3,9,12</sup> and Manel Juan<sup>2,3,6,9</sup>

<sup>1</sup>Department of Hematology, ICMHO, Hospital Clínic de Barcelona, Villarroel 170, 08036 Barcelona, Spain; <sup>2</sup>Department of Immunology, CDB, Hospital Clínic de Barcelona, Villarroel 170, 08036 Barcelona, Spain; <sup>3</sup>Institut d'Investigacions Biomèdiques August Pi i Sunyer - IDIBAPS, Rosselló 153, 08036 Barcelona, Spain; <sup>4</sup>Stem Cells and Regenerative Medicine Laboratory, Production and Validation Center of Advanced Therapies (Creatio), Department of Biomedical Sciences, University of Barcelona, Casanova 143, 08036 Barcelona, Spain; <sup>5</sup>Physiopathology and Molecular Bases in Hematology Group, IDIBAPS, Rosselló 153, 08036 Barcelona, Spain; <sup>6</sup>Institut de Recerca Pediàtrica Hospital Sant Joan de Déu, Universitat de Barcelona, Passeig de Sant Joan de Déu, 2, 08950 Esplugues de Llobregat, Barcelona, Spain; <sup>7</sup>Josep Carreras Leukemia Research Institute, Department of Biomedicine, School of Medicine, University of Barcelona, Casanova 143, 08036 Barcelona, Spain; <sup>8</sup>Department of Pathology, Hospital Clínic, IDIBAPS, Villarroel 170, 08036 Barcelona, Spain; <sup>9</sup>Universitat de Barcelona, Casanova 143, 08036 Barcelona, Spain; <sup>10</sup>Department of Hemotherapy and Hemostasis, ICMHO, Hospital Clínic de Barcelona, Villarroel 170, 08036 Barcelona, Spain; <sup>11</sup>Unit of Advanced Therapies, Hospital Clínic de Barcelona, Blood and Tissue Bank -BST-, Passeig del Taulat, 106, 08005 Barcelona, Spain; <sup>12</sup>Centro de Investigación Biomedica en Red de Cancer (ISCIII-CIBERONC), Barcelona, Spain; <sup>13</sup>Institució Catalana de Recerca i Estudis Avancats (ICREA), Barcelona, Spain; <sup>14</sup>Immunology Unit, Department of Biomedical Sciences, University of Barcelona, Casanova 143, 08036 Barcelona, Spain

**Genetically modifying autologous T cells to express an anti-CD19 chimeric antigen receptor (CAR) has shown impressive response rates for the treatment of CD19+ B cell malignancies in several clinical trials (CTs). Making this treatment available to our patients prompted us to develop a novel CART19 based on our own anti-CD19 antibody (A3B1), followed by CD8 hinge and transmembrane region, 4-1BB- and CD3z-signaling domains. We show that A3B1 CAR T cells are highly cytotoxic and specific against CD19+ cells *in vitro*, inducing secretion of pro-inflammatory cytokines and CAR T cell proliferation. *In vivo*, A3B1 CAR T cells are able to fully control disease progression in an NOD.Cg-Prkdc<sup>scid</sup> Il2rd<sup>tm1Wjl</sup>/SzJ (NSG) xenograph B-ALL mouse model. Based on the pre-clinical data, we conclude that our CART19 is clearly functional against CD19+ cells, to a level similar to other CAR19s currently being used in the clinic. Concurrently, we describe the implementation of our CAR T cell production system, using lentiviral vector and CliniMACS Prodigy, within a medium-sized academic institution. The results of the validation phase show our system is robust and reproducible, while maintaining a low cost that is affordable for academic institutions. Our model can serve as a paradigm for similar institutions, and it may help to make CAR T cell treatment available to all patients.**

## INTRODUCTION

Genetically modifying autologous T cells to express chimeric antigen receptors (CARs), thus redirecting them to eliminate tumor cells, is a new and revolutionary therapeutic modality for cancer treatment and, in particular, for CD19+ B cell malignancies.<sup>1-9</sup>

CARs are composed of an extracellular region responsible for binding to a particular antigen and an intracellular region that promotes T cell cytotoxic activity and proliferation. CAR binding to the selected antigen is usually mediated by a single-chain variable fragment (scFv) of a monoclonal antibody. The scFv-derived region results in a medium- to high-affinity and major histocompatibility complex (MHC)-independent interaction of the CAR with its ligand. As a second generation CAR, this scFv is combined with an intracellular

Received 31 August 2018; accepted 29 November 2018;  
<https://doi.org/10.1016/j.omtm.2018.11.010>.

<sup>15</sup>These authors contributed equally to this work.

**Correspondence:** Manel Juan, Department of Immunology, CDB, Hospital Clínic de Barcelona, Villarroel 170, 08036 Barcelona, Spain.

**E-mail:** [mjuan@clinic.cat](mailto:mjuan@clinic.cat)

**Correspondence:** Julio Delgado, Department of Hematology, ICMHO, Hospital Clínic de Barcelona, Villarroel 170, 08036 Barcelona, Spain.

**E-mail:** [jdelgado@clinic.cat](mailto:jdelgado@clinic.cat)

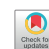

co-stimulatory domain (usually CD28 or 4-1BB) and a pro-activator cytotoxic domain (CD3z).<sup>10-12</sup>

After initial disappointing results with first-generation CARs, the most recent clinical trials with second-generation anti-CD19 CAR T cells have shown remarkable results in patients with chronic lymphocytic leukemia, non-Hodgkin's lymphoma, and acute lymphoid leukemia (ALL), reviewed in Wang et al.<sup>8</sup> and Lorentzen and Straten.<sup>13</sup> Several academic groups, including the University of Pennsylvania, Memorial Sloan Kettering Cancer Center, the National Cancer Institute, and the Fred Hutchinson Cancer Research Center, pioneered these seminal studies using slightly different CAR constructs in terms of ScFv sequence, co-stimulatory domain, and transmembrane-hinge region. These CARs are currently under evaluation in a number of international multi-center clinical trials. Two of them, tisagenlecleucel (Kymriah, Novartis) and axicabtagene ciloleucel (Yescarta, Kyte-Gilead), have been approved by the U.S. Food and Drug Administration, European Union (EU), and Canada for clinical use. Regarding efficacy, response rates range from 50% to 85%, depending on the type of B cell malignancy and CAR construct, with quite remarkable disease-free and overall survival.<sup>13</sup> In terms of safety, patients who respond to therapy usually develop persistent B cell aplasia and transitory cytokine release syndrome, which could be severe in a small proportion of patients.<sup>14</sup>

Despite these striking results, this therapeutic approach is currently available only in a handful of centers. With Kymriah and Yescarta approval for certain diseases, this treatment will become available in multiple places (in and outside the United States), although the high cost can still limit access. For these reasons, we decided to develop our own CAR construct targeting CD19 (ARI-0001) that comprises an scFv of our own anti-CD19 monoclonal antibody (mAb) (A3B1) plus the 4-1BB- and CD3z-signaling domains. This paper shows the results of pre-clinical work as well as the description of our production system for ARI-0001 cells, focusing on the results of the validation phase of our clinical trial (CART19-BE-01), which has enrolled and treated more than 20 patients and is currently ongoing. Our work demonstrates the feasibility of producing CAR T cells in medium-sized academic institutions.

## RESULTS

### Validation of Anti-hCD19 A3B1 mAb

Our anti-hCD19 A3B1 mAb has been used in previous studies.<sup>15</sup> Nevertheless, we designed a set of experiments to further confirm its specificity. As shown in Figure S1A, anti-hCD19 A3B1 reacted against the mouse lymphoma cell line 300.19 transfected with hCD19, but not with untransfected cells. Anti-hCD19 A3B1 also reacted with a subset of human peripheral blood cells, as expected (Figure S1B). Anti-hCD19 A3B1 reacted with B cell lines Raji and Daudi, while no reactivity was observed when T, myeloid, or natural killer (NK) cell lines were used, consistent with the pattern of CD19 expression (Figure S1C). Furthermore, we show that pre-incubation of Daudi cells with the anti-CD19 FMC63 antibody blocked the bind-

ing of A3B1, confirming its specificity for CD19 (Figure S1D). These data also suggest that A3B1 and FMC63 antibodies have overlapping epitopes. Finally, a band of around 100 kDa was precipitated from Daudi cells using anti-hCD19 A3B1, consistent with the expected molecular weight of CD19 (Figure S1E). All these data together indicate that A3B1 is a highly sensitive and specific antibody for human CD19 protein.

### In Vitro Evaluation of ARI-0001 Efficacy

The scFv of anti-CD19 A3B1 antibody was cloned in frame with the rest of the CAR-signaling domains in a lentiviral vector (pCCL) (Figure 1A). For the evaluation of CAR19 A3B1 efficacy, peripheral blood mononuclear cells (PBMCs) isolated from buffy-coats were activated using CD3 and CD28 dynabeads and subsequently transduced using CAR19-containing lentivirus. After an expansion period, the expression of CAR19 on T cells was confirmed by flow cytometry (Figure S2A). The percentage of ARI-0001 cells varied between 20% and 56%, depending on the experiment.

Cytotoxicity of ARI-0001 cells was measured by the *in vitro* eradication of the CD19-positive NALM6 cell line. For this purpose, we developed a flow cytometry-based assay to quantify the number of viable, CD19+ cells (see Materials and Methods and Figure S3). NALM6 cells were almost completely eliminated after 16 hr of co-culture, even after very low effector (E):target (T) ratios (1 effector cell for every 8 target cells). We also observed a minor cytotoxic effect of untransduced (UT) cells due to alloreactivity (Figure 1B). Target cell specificity was also tested by measuring the survival of a CD19-negative HL60 cell line in co-culture with ARI-0001 cells. As expected, no ARI-0001-mediated killing was appreciated in this case (Figure S2B). The cytotoxicity of ARI-0001 cells was also tested against primary B cell acute lymphocytic leukemia (B-ALL) cells, demonstrating similar efficacy (Figure S2C). All these data together indicate that our ARI-0001 cells exhibit a potent and specific cytotoxic effect against CD19-positive cells *in vitro*.

To better characterize ARI-0001 cell response upon CD19 binding, cell proliferation was measured by using a standard carboxyfluorescein diacetate succinimidyl ester (CFSE) assay at the 96-hr time point. Antigen binding should be able to promote ARI-0001 cell expansion in order to eliminate a tumor *in vivo*. As shown in Figure 1C, ARI-0001 cells proliferated in contact with the CD19+ NALM6 cell line and in response to interleukin-2 (IL-2) (to a minor extent). No proliferation was observed in the absence of stimulus or in contact with a CD19-negative cell line (K562), confirming that cell proliferation was mediated by CD19 recognition.

Finally, ARI-0001 cell production of cytokines was measured in the supernatant of effector-target cell co-cultures after 16 hr and analyzed using an ELISA. Cytokine levels from co-cultures using ARI-0001 or UT cells were compared (Figure 1D). While UT cells did not show an increase in interferon (IFN) $\gamma$  and tumor necrosis factor alpha (TNF- $\alpha$ ), ARI-0001 cells showed a significant increase in these two pro-inflammatory cytokines. As expected, a very minor

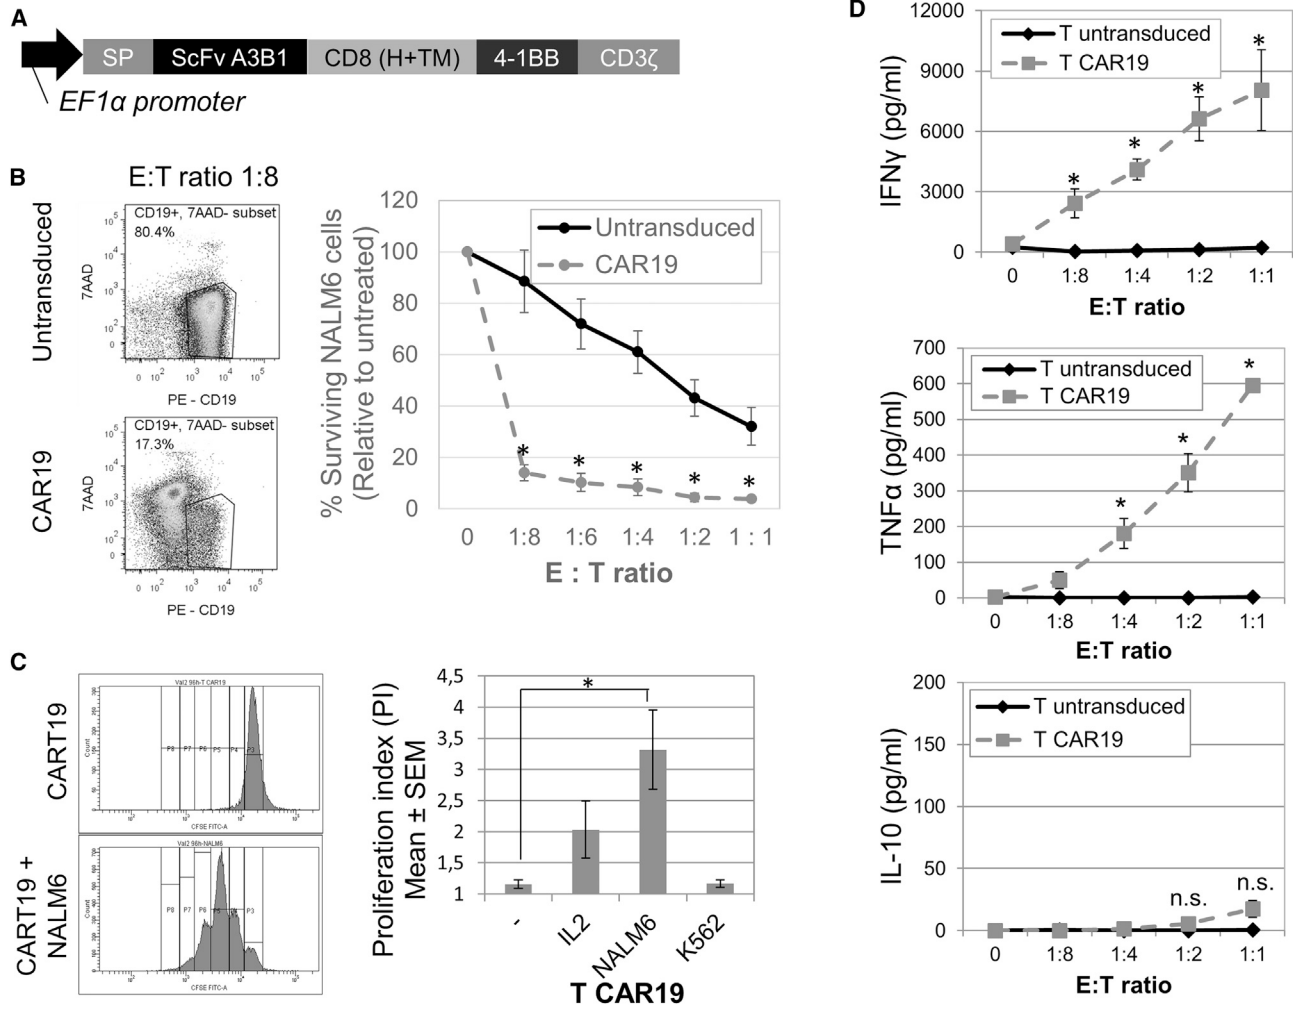

**Figure 1. ARI-0001 Anti-tumor Activity In Vitro**

(A) Diagram of A3B1 CAR19 construct. (B) Cytotoxicity assay of CART19 cells versus NALM6 cells at the 16-hr time point. Percent target surviving cells, relative to untreated, is shown (mean of 3 experiments  $\pm$  SEM). Panels on the right show representative flow cytometry plots at E:T ratio = 1:8. (C) CART19 T cell proliferation *in vitro* measured by CFSE assay at the 96-hr time point. Panels on the left show representative flow cytometry images. Panel on the right shows quantification of the proliferation index (PI). Mean of 4 experiments  $\pm$  SEM is shown. (D) Cytokine production (IFN $\gamma$ , TNF- $\alpha$ , and IL-10) of CART19 cells in co-culture with NALM6 cells at the 16-hr time point, measured by ELISA. Mean of 3 experiments  $\pm$  SEM is shown. \*Statistical significance,  $p < 0.05$ ; n.s., not statistically significant.

and not significant increase in the anti-inflammatory cytokine IL-10 was observed.

#### In Vivo Evaluation of ARI-0001 Efficacy

To evaluate the efficacy of the CART19 cells *in vivo*, we performed a xenograft experiment in NOD.Cg-Prkdc<sup>scid</sup> Il2rd<sup>tm1Wjl</sup>/SzJ (NSG) mice.

Mice were randomly allocated to the administration of vehicle (A), UT cells (B), ARI-0001 cells (C), NALM6 cells (D), NALM6 plus UT cells (E), and NALM6 plus ARI-0001 cells (F). Mice corresponding to groups D–F were inoculated with NALM6-Luc + GFP + (CD19+) cells through their tail vein on day 1. On day 4, mice

belonging to groups B, C, E, and F were infused with either UT cells or ARI-0001 cells.

As shown in Figure 2A, disease progression was clearly observed during a period of 2 weeks following NALM6 cell infusion in the NALM6 group (5 of 6 animals progressed) and the NALM6 + UT cell group (4 of 4 animals progressed). However, no disease was detected in any of the mice belonging to the NALM6 + ARI-0001 group (0 of 6 mice progressed). The experiment was completed and the animals sacrificed at days 16–17, when the animals belonging to the NALM6 group started to show evident signs of disease. To confirm bioluminescence imaging data, bone marrow and blood cells were processed for flow cytometry. Anti-human CD19 staining confirmed

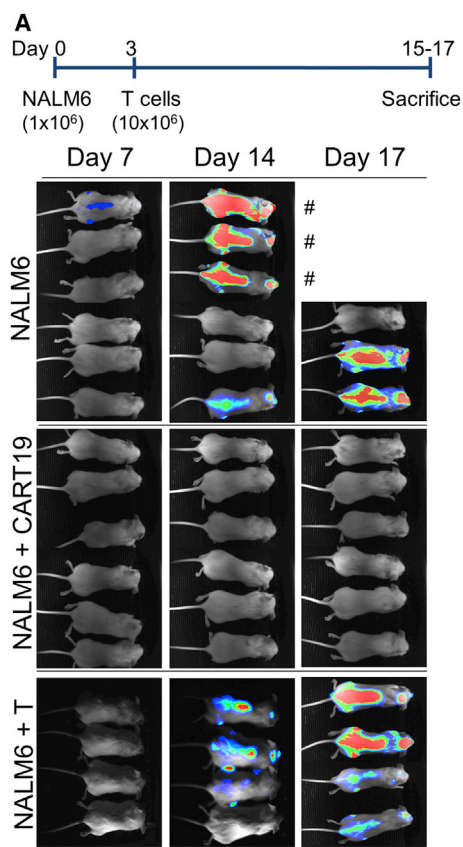

the presence of tumor cells in the NALM6 and NALM6 + UT groups, while no significant percentages of tumor cells were detected in the other groups (Figures 2B and 2C) compared to control.

#### Comparison of Cytotoxic Activity of ARI-0001 Cells to Other CART19 Constructs

To investigate how ARI-0001 cells, which contain the scFv from the A3B1 antibody, perform compared to other CART19 cells currently in use for the treatment of CD19+ malignancies, we cloned the scFv of the FMC63 antibody in our vector. The rest of the CAR construct remained the same, so we could directly compare the efficiency of both scFv fragments. For these analyses, we transduced PBMCs with a lentivirus containing each one of the CAR constructs. CART19 protein expression was confirmed by western blot (Figure 3A). The cytotoxic activity of A3B1 and FMC63 CAR T cells was then compared *in vitro*. Figure 3B demonstrates no significant difference in cytotoxic potency between the CARs.

The two CAR constructs were then compared *in vivo*. For this experiment, the disease was allowed to progress before administering CAR T cells. The complete experimental design is depicted in Figure 3C. As shown in Figure 3C, NALM6 cell engraftment was detected by bioluminescence imaging 6 days after injecting NALM6 cells in all mice. Following the administration of UT T cells, disease continued to

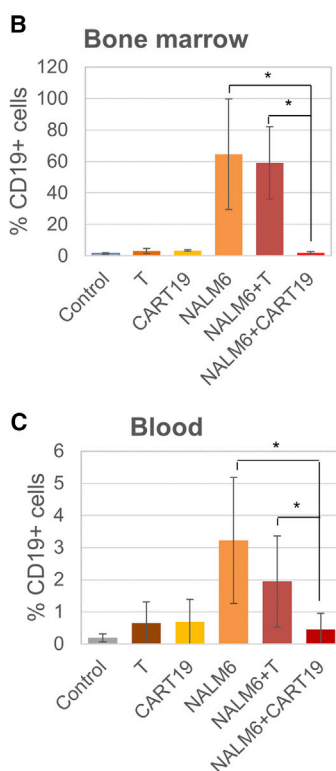

#### Figure 2. ARI-0001 Anti-tumor Activity *In Vivo*

(A) Upper panel shows a timeline of experimental design. Lower panels show bioluminescence images showing disease progression at different days. Animals indicated by a pound sign were sacrificed at day 16 due to advanced disease progression. The rest of the animals were sacrificed at day 17. (B) Detection of tumor (CD19+) cells in the bone marrow of mice shown in (A) (mean  $\pm$  SD). (C) Detection of tumor (CD19+) cells in blood.

progress in the NALM6 + T group, while A3B1 and FMC63 CAR T cells progressively eliminated the tumor. Animals in the NALM6 + T group were sacrificed between days 11 and 12 due to disease progression. Quantification of the bioluminescence images indicated no statistical difference in the capacity of A3B1 and FMC63 CAR T cells to eliminate the tumor cells (Figure S4). Finally, flow cytometry performed on blood of these mice, taken at day 12 after T cell injection, confirmed no detectable disease in the blood of treated mice and T cell expansion (Figure 3D). The level of disease eradication and T cell expansion was equal between the two groups (A3B1 and FMC63).

Altogether, these data indicate that A3B1 scFv is capable of binding to CD19, triggering a cytotoxic response, and eliminating a tumor to a level similar to FMC63.

#### Large-Scale CART19 Lentivirus Production

Having demonstrated the efficacy and specificity of ARI-0001 cells *in vivo* and *in vitro*, we proceeded to set up and standardize the conditions for patient-scale ARI-0001 cell production.

To produce enough lentiviral supernatant to complete the clinical trial, we scaled up our virus production method, and we conducted the entire process inside a clean room facility following Good Manufacturing Practice (GMP) guidelines, although lentiviral supernatant was considered to be an intermediate reagent in terms of drug agency approval. An overview of the process highlighting the critical steps is depicted in Figure 4. Each lot consisted of 4 L of unconcentrated virus and the production time per lot was 12 days. HEK293T was used as the packaging cell line. Before starting production, HEK293T master and working cell banks were prepared, so all lots were produced using HEK293T from the same passage.

For each production, we first expanded HEK293T in T175 flasks for 2 passages (expanding from  $80 \times 10^6$  cells to a minimum of  $2,829 \times 10^6$  cells). Cells were then transferred to four 10-layer CellStacks cell culture chambers (Corning) and one 1-layer CellStack to control for cell proliferation. Plasmid transfection was carried out the next day



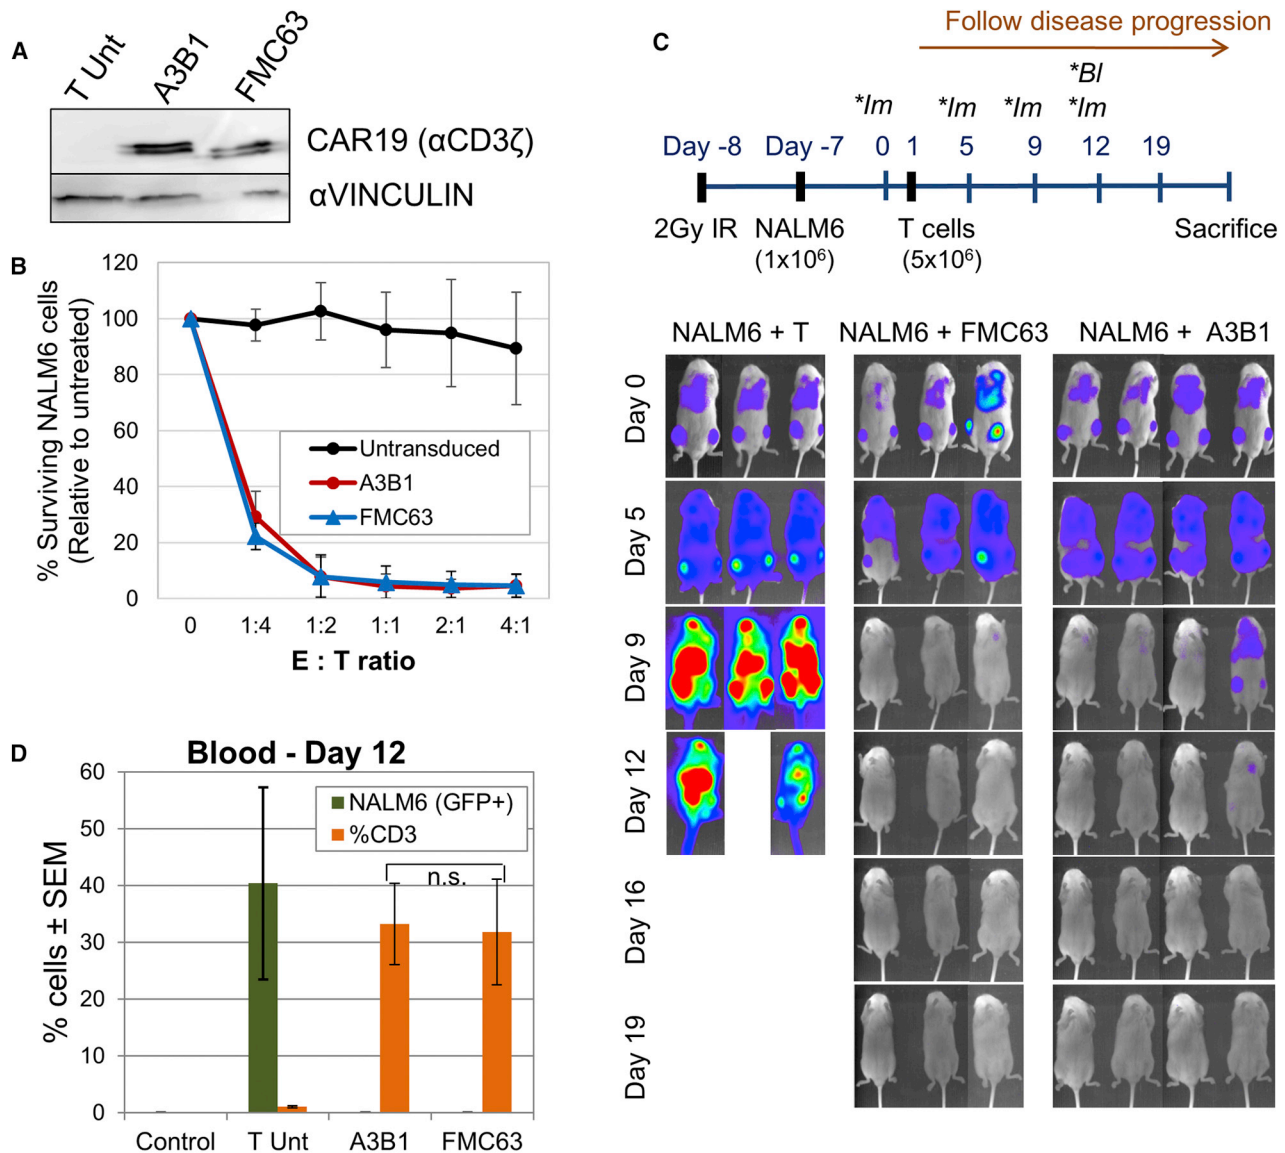

**Figure 3. Comparison of Anti-tumor Activity of A3B1- and FMC63-based CAR T Cells**

(A) Detection of chimeric antigen receptor (CAR) expression by western blot. (B) Cytotoxicity assay of CART19 cells versus NALM6 cells after 4 hr of co-culture. Percent target surviving cells, relative to untreated, is shown (mean of 3 experiments  $\pm$  SEM). (C) Upper panel shows a timeline of experimental design (\*Im, bioluminescent image; \*Bl, blood sample). Lower panels show bioluminescence images showing disease progression at different days. (D) Detection of tumor (GFP+) cells and CD3+ cells in blood by flow cytometry. Control, control mice (no tumor or T cells were injected).

using 3.86 mg polyethylenimine (PEI), 763  $\mu$ g transfer vector, 377  $\mu$ g pMDLg-pRRE, 188  $\mu$ g pRSV-Rev, and 221  $\mu$ g pMD2.G per liter. Viral supernatants were collected 2 days later and clarified using a 0.45- $\mu$ m polyvinylidene fluoride (PVDF) membrane. 4 L viral supernatant was finally concentrated and diafiltered using KrosFlo Research III Tangential Flow Filtration System (Spectrum Labs) and 500 kD modified polyethersulfone (mPES) hollow fibers. 2 L PBS was used as diafiltration buffer. Each lot was concentrated to 100 mL, aliquoted in 10-mL bags, and kept at  $-80^{\circ}\text{C}$  until use.

Smaller aliquots were also kept for viral titer determination and sterility and purity analyses. For protocol validation, 3 viral lots were produced and analyzed. The results of analyses performed on these 3 lots are shown in Table 1. Viral titer of frozen-concentrated virus ranged between 1.1 and  $2.2 \times 10^8$  transducing units (TU)/mL. Quality control testing indicated that all three lots were negative for bacterial-fungal growth, mycoplasma, or replication-competent lentivirus (RCL). Virus identity was also confirmed by PCR amplification of principal virus components.

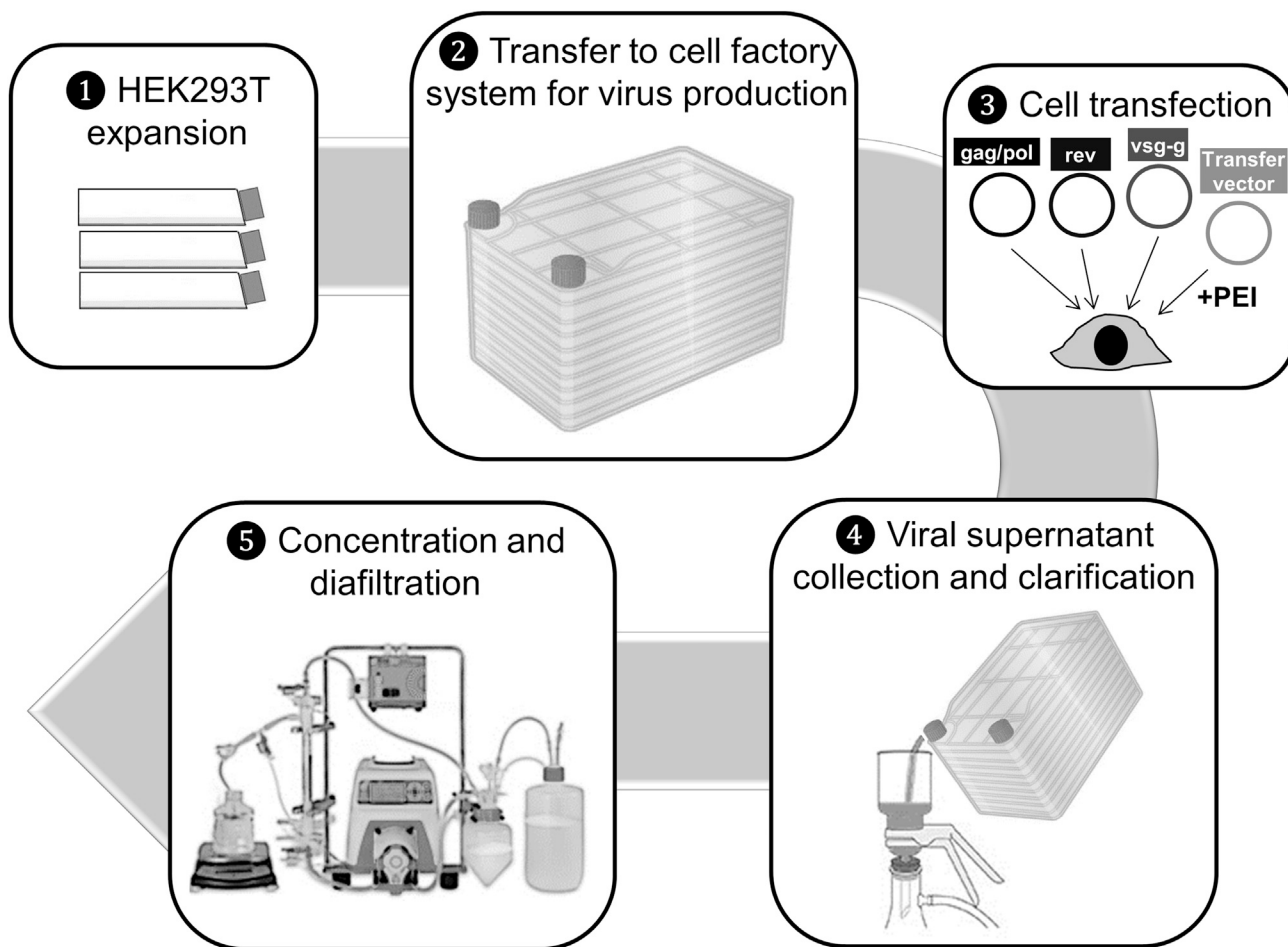

Figure 4. Diagram Depicting the Main Steps of Large-Scale CAR19 Lentivirus Production as Currently Established at Hospital Clínic de Barcelona

#### ARI-0001 Cell Production

ARI-0001 cells were produced using CliniMACS Prodigy (Miltenyi Biotec). Apheresis products were subjected to CD4- and CD8-positive selection, and  $100 \times 10^6$  T cells were then cultured and activated using anti-CD3 and anti-CD28 antibodies. At 24 hr after activation, cells were transduced with CAR19 lentivirus (MOI = 10). Cells were cultured in media containing IL-7 and IL-15 until the desired cell number was reached (typically 8–9 days). T cell expansion with IL-7 and IL-15 has been shown to result in a much more  $T_N$  and  $T_{SCM}$  phenotype than when using expansion with IL-2, which favors  $T_{EFF}$ .<sup>16</sup> The product was collected in NaCl 0.9% + 0.5% human serum albumin (HSA). To test the consistency and robustness of our production method, we conducted three procedures using apheresis products from three different healthy donors. Our goal was to reach a minimum of  $35 \times 10^6$  ARI-0001 cells and  $\geq 20\%$  transduction efficiency.

As shown in Figure 5, the expansion time varied between 8 and 11 days. Run ARI0001/01 was allowed to proceed to day 11 to test

Prodigy's T cell expansion capacity, but the rest of the runs were stopped earlier (day 9 and day 8, respectively), since the minimum number of cells required was already reached. A mean of  $3,780 \times 10^6$  total cells was obtained, and the percentage of transduction averaged 35.8% at the time the cell expansion was terminated. Therefore, the acceptance criteria were reached in all three procedures. A full list of the quality tests conducted on the final products and the acceptance criteria that were defined for each of them is provided in Table 2. As shown in the same table, all ARI-0001 products obtained met the acceptance criteria established for all parameters regarding purity, safety, and potency. The results of *in vitro* cytotoxicity assay (potency) performed with the ARI-0001 final products are shown in Figure S5.

#### DISCUSSION

The use of genetically modified autologous T cells that express an anti-CD19 CAR (CART19) has shown impressive response rates for the treatment of CD19-positive B cell malignancies in several clinical trials. However, bringing this experimental treatment to commercialization phase is a lengthy process. The urgent need to make this

**Table 1. Results and Quality Controls of GMP-Grade Viral Productions of 3 Supernatant Lots**

| Parameter                              | Method            | Acceptance Criteria       | Lot 1                    | Lot 2                    | Lot 3                    |
|----------------------------------------|-------------------|---------------------------|--------------------------|--------------------------|--------------------------|
| Appearance                             | visual inspection | yellowish liquid solution | cloudy liquid solution   | cloudy liquid solution   | cloudy liquid solution   |
| Viral titer                            | limiting dilution | $>3.75 \times 10^7$ TU/mL | $2.29 \times 10^8$ TU/mL | $1.68 \times 10^8$ TU/mL | $1.10 \times 10^8$ TU/mL |
| Sterility                              | microbial growth  | sterile                   | sterile                  | sterile                  | sterile                  |
| Mycoplasma                             | PCR               | absent                    | absent                   | absent                   | absent                   |
| Identity                               | PCR               | positive                  | positive                 | positive                 | positive                 |
| RCL (replication-competent lentivirus) | real-time PCR     | absent                    | absent                   | absent                   | absent                   |

treatment available to our patients prompted us to develop a new anti-CD19 CAR based on our own anti-CD19 antibody (A3B1).

There are many different CART19 constructs currently being evaluated in pre-clinical as well as in clinical studies.<sup>12</sup> We decided to use a second-generation CAR with 4-1BB co-stimulator, based on the CAR developed by UPenn-CHOP, since it has shown a significantly longer persistence of CART19 cells both in mice and in humans.<sup>17,18</sup> We saw that our A3B1-CART (ARI-0001) cells were able to efficiently and specifically eliminate CD19-positive cells, both *in vitro* and *in vivo*, triggering a pro-inflammatory cytokine response and T cell proliferation—all necessary events for clinical efficacy. Our construct incorporates the scFv belonging to the A3B1 anti-CD19 antibody, which has never been used for therapeutic purposes before. We demonstrated that the *in vitro* and *in vivo* efficacy of ARI-0001 cells was similar to other constructs currently in use. This indicates that A3B1 antibody has a good avidity for its epitope and is consistent with the fact that CD19 possesses a single dominant epitope or adjacent epitopes.<sup>19</sup> Thus, a change of scFv might not be as determinant for a good CAR19 response as with other target proteins.

Having shown that ARI-0001 cells perform as expected in pre-clinical studies and their *in vitro* effectivity might be comparable to other CART19 constructs currently used, the next step was to set up the infrastructure and the procedures to be able to move ARI-0001 cells to the clinic. This represents a considerably big enterprise for a relatively small publicly funded institution, but its success relies on two important facts: (1) involvement of a large number of groups from different disciplines and organizations in the project, which included basic scientists, hemato-oncology and immunotherapy clinical units, and GMP facilities with expertise in cellular therapies; and (2) CARs other than anti-CD19 that are currently being developed easily at the pre-clinical stage by several basic science labs in the Hospital Clínic-influenced area. Therefore, the platform created to transfer the anti-CD19 CAR from bench to bedside will also serve to promote quicker and easier transfer of other CARs to clinic.

ARI-0001 cell production includes two independent procedures: (1) large-scale vector production, and (2) *ex vivo* transduction and expansion of genetically engineered T cells. For vector production, we chose a third-generation lentiviral vector, since it is considered to be safer for patients than retroviral vectors or second-generation

lentivirus.<sup>20–22</sup> However, it is important to note that a third-generation lentiviral system is the least efficient of the three, in terms of quantity of viral particles per milliliter obtained, thus increasing the cost of the process. Large-scale lentivirus production can constitute a bottleneck of CAR T cell production. Many different cell culture systems can be used, from regular T175 flasks for adherent cultures to bioreactors. We decided to use an intermediate system, similar to a previously described method,<sup>23,24</sup> consisting of expanding HEK293T in T175 and then transferring to ten-layer flasks with 1-L capacity each for cell transfection and viral supernatant collection. We produced viral batches of 4-L unconcentrated virus each, which allowed the transduction of 8 patients/viral batch. The viral titer obtained was in range with what has been reported by other viral production facilities, reviewed in Merten et al.<sup>25</sup> There is an obvious limit in the capacity of scaling up this method. Therefore, depending on the number of patients that are planned to be treated per year, other systems, including the use of bioreactors and cell suspension systems, should be considered.<sup>26,27</sup>

There are many different systems currently being used for the *ex vivo* transduction and expansion of CAR T cells.<sup>28,29</sup> We decided to use the CliniMACS Prodigy system for the production of ARI-0001 cells, since it offers two key advantages that fitted well with our production model: (1) CliniMACS Prodigy is a semi-automated system that allows magnetic cell separation, cell activation, transduction, and expansion in a single machine; and (2) it is a closed GMP-compliant system, bypassing the need to conduct the whole process inside a specific GMP gene therapy clean room. Although the CliniMACS Prodigy also has some disadvantages compared to other technologies available, i.e., WAVE expansion system allows for a significantly higher T cell expansion and process adaptability,<sup>30</sup> it was shown to be a robust and reproducible procedure in our hands.

In conclusion, we have developed a novel anti-CD19 CAR construct based on a well-defined design (the UPenn-CHOP proposal), conformed by an scFv of our own anti-CD19 mAb (A3B1) plus the 4-1BB- and CD3z-signaling domains. After positively fulfilling pre-clinical experiments and demonstrating robust and reproducible lentivirus and ARI-0001 cell production, a pilot clinical trial (CART19-BE-01, ClinicalTrials.gov: NCT03144583) for the treatment of CD19-positive malignancies was recently launched in 2017 at Hospital Clínic and Hospital Sant Joan de Déu in Barcelona

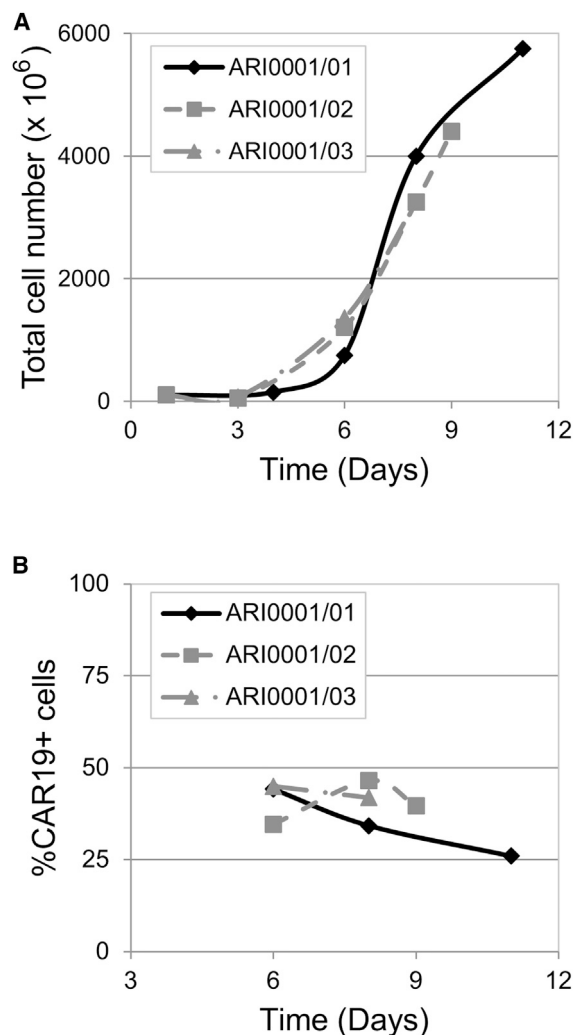

**Figure 5. Results of 3 Validation Processes of ARI-0001 Cell Production Using Healthy Donors**

(A) Total cell number at different time points. (B) Percentage of CAR19-expressing cells at different time points.

(Spain) and is now ongoing. Current results of more than 10 ARI-0001 clinical grade products, developed for patients enrolled in ClinicalTrials.gov: NCT03144583, show characteristics of equivalence to the products presented here corresponding to the validation step (unpublished data). Taking all these data together, this work demonstrates that ARI-0001 cell production is robust, reproducible, and affordable for academic institutions that try to introduce this effective immunotherapy to their patients.

## MATERIALS AND METHODS

### Donors, Cell Lines, and A3B1 Anti-CD19 mAb

All protocols were approved by the corresponding Institutional Review Board. Healthy donor blood buffy-coats were obtained from the local reference blood bank (Banc de Sang i Teixits, Barcelona).

NALM6, HL60, K562, and 300.19 cell lines were purchased from the American Type Culture Collection (ATCC). These four cell lines were cultured in RPMI media + 10% fetal bovine serum (FBS) + antibiotics. The HEK293T cell line was also purchased from the ATCC (CRL-11268) and cultured in DMEM + 10% FBS + antibiotics. All cell lines were grown at 37°C and 5% CO<sub>2</sub>. 300.19-hCD19 stable transfected cells were produced using pUNO1-CD19 cDNA (InvivoGen, San Diego, CA), as described in Massaguer et al.<sup>31</sup>

The A3B1 murine anti-CD19 mAb was generated at the Department of Immunology (Hospital Clinic de Barcelona), and its anti-CD19 specificity was confirmed by our own recent (Figure 1) and previous studies<sup>15</sup> and several commercial distributors (Abcam, Immunostep, and CliniSciences). Studies of A3B1 reactivity and blocking experiment were performed as described in Romero et al.<sup>32</sup>

### CAR19 Cloning and Lentivirus Production

The sequence corresponding to the variable light (VL) and variable heavy (VH) regions of A3B1 antibody was extracted from A3B1 hybridoma cells using Mouse Ig-Primer Set (Novagen, 69831-3). The complete CAR19 sequence (including signal peptide, A3B1 scFv, CD8 hinge, and transmembrane regions 4-1BB and CD3z) was synthesized by GenScript and cloned into the third-generation lentiviral vector pCCL (kindly provided by Dr. Luigi Naldini; San Raffaele Hospital, Milan),<sup>20</sup> under the control of EF1 $\alpha$  promoter (Figure 2A). The scFv sequence of the FMC63 antibody was extracted from patent WO2012079000<sup>33</sup> and similarly cloned into the pCCL vector.

To produce lentiviral particles for pre-clinical studies, HEK293T cells were transfected with our transfer vector (pCCL-EF1 $\alpha$ -CAR19) together with packaging plasmids pMDLg-pRRE (Addgene, 12251), pRSV-Rev (Addgene, 12253), and envelope plasmid pMD2.G (Addgene, 12259), using linear PEI molecular weight (MW) 25,000 (Polysciences, 23966-1). Briefly, 6 × 10<sup>6</sup> HEK293T cells were plated 24 hr before transfection in 10-cm dishes. At the time of transfection, 14  $\mu$ g total DNA (6.9  $\mu$ g transfer vector, 3.41  $\mu$ g pMDLg/pRRE, 1.7  $\mu$ g pRSV-Rev, and 2  $\mu$ g pMD2.G) was diluted in serum-free DMEM. 35  $\mu$ g PEI was added to the mix and incubated for 20 min at room temperature. After incubation, DNA-PEI complexes were added onto the cells cultured in 7 mL complete DMEM. Media were replaced 4 hr later. Viral supernatants were collected 48 hr later and clarified by centrifugation and filtration using a 0.45- $\mu$ m filter. Viral supernatants were concentrated using ultracentrifugation at 26,000 rpm for 2 hr 30 min. Virus-containing pellets were resuspended in complete XVivo15 media and stored at -80°C until use.

### Lentivirus Titration

The number of transducing units (TU/mL) was determined by the limiting dilution method. Briefly, HEK293T cells were seeded 24 hr before transduction. Then, 1:10 dilutions of the viral supernatant were prepared and added on top of the cells in complete DMEM + 5  $\mu$ g/mL Polybrene. Cells were trypsinized 48 hr later and labeled with allophycocyanin (APC)-conjugated AffiniPureF(ab')<sub>2</sub> Fragment Goat anti-mouse immunoglobulin G (IgG) (Jackson ImmunoResearch



**Table 2. ARI-0001 Product Specification List and Acceptance Criteria**

| Parameter                              | Method                                            | Acceptance Criteria                                                                                                                                                                      | ARI0001/01             | ARI0001/02             | ARI0001/03             |
|----------------------------------------|---------------------------------------------------|------------------------------------------------------------------------------------------------------------------------------------------------------------------------------------------|------------------------|------------------------|------------------------|
| Appearance                             | visual inspection                                 | cloudy liquid solution                                                                                                                                                                   | cloudy liquid solution | cloudy liquid solution | cloudy liquid solution |
| Number of CAR19+ cells                 | Neubauer cell counting and flow cytometry         | $35 \times 10^6$ cells for a 70-kg patient ( $>0.5 \times 10^6$ cells/kg)                                                                                                                | $1,495 \times 10^6$    | $1,746 \times 10^6$    | $1,340 \times 10^6$    |
| CAR19+ cells (%)                       | flow cytometry                                    | $\geq 20\%$                                                                                                                                                                              | 26.0                   | 41.9                   | 39.7                   |
| CD3+ cells (%)                         | flow cytometry                                    | $\geq 70\%$                                                                                                                                                                              | 97.9                   | 98.6                   | 98.6                   |
| Cell viability (%)                     | Neubauer cell counting with trypan blue exclusion | $\geq 70\%$                                                                                                                                                                              | 97.9                   | 98.1                   | 98.0                   |
| Sterility                              | microbial growth                                  | sterile                                                                                                                                                                                  | sterile                | sterile                | sterile                |
| Mycoplasma                             | PCR                                               | absent                                                                                                                                                                                   | absent                 | absent                 | absent                 |
| Endotoxin                              | chromogenic assay                                 | $\leq 0.5$ EU/mL                                                                                                                                                                         | $\leq 0.5$ EU/mL       | $\leq 0.5$ EU/mL       | $\leq 0.5$ EU/mL       |
| Adventitious viruses                   | PCR                                               | absent                                                                                                                                                                                   | absent                 | absent                 | absent                 |
| Number of transgene copies/cell        | real-time PCR                                     | $\leq 10$ copies/cell                                                                                                                                                                    | 1.45                   | 2.32                   | 2.51                   |
| RCL (replication-competent lentivirus) | real-time PCR                                     | absent                                                                                                                                                                                   | absent                 | absent                 | absent                 |
| Cytotoxic potency                      | flow cytometry                                    | (a) NALM6 cell surviving fraction using CART19 ratio E:T 1:1 $<70\%$ or (b) difference in NALM6 cell surviving fraction between CART19 versus untransduced T using ratio E:T 4:1 $>50\%$ | (a) 14.9; (b) 90.9     | (a) 40.4; (b) 64.6     | (a) 43.0; (b) 67.0     |

Laboratories, 115-136-072) before being analyzed by flow cytometry. A dilution corresponding to 2%–20% of positive cells was used to calculate viral titer.

### T Cell Transduction and Culture Conditions

Healthy donor PBMCs were obtained from buffy-coats by density-gradient centrifugation (Ficoll) after donation was consented, following the instructions of the Ethics Committee. While monocytes were eliminated by conventional plate adhesion, the remaining cells were cultured in X-VIVO 15 Cell Medium (Cultek, BE02-060Q), 5% AB human serum (Sigma, H4522), penicillin-streptomycin (100  $\mu\text{g}/\text{mL}$ ), and IL-2 (50 IU/mL; Miltenyi Biotec). Cells were then activated and expanded for 24 hr using beads conjugated with CD3 and CD28 mAbs (Dynabeads, Gibco, 11131D), and they were transduced 24 hr later with the lentivirus by overnight incubation in the presence of polybrene (Santa Cruz Biotechnology, sc-134220) at 8  $\mu\text{g}/\text{mL}$ . A period of cell expansion of 6–8 days was necessary before conducting experiments. Three different cell transductions using three different PBMC donors were used to conduct the experiments in triplicate.

### Flow Cytometry

The following mAbs against human proteins, all from BD Biosciences, were used: CD3-fluorescein isothiocyanate (FITC), CD4-BV421, CD8-APC, CD19-phycoerythrin (PE), and CD33-PE. 7-AAD was used as a viability marker (Thermo Fisher Scientific, A1310). CAR19 expression was detected with an APC-conjugated AffiniPureF(ab')<sub>2</sub>-fragment goat-anti-mouse IgG (Jackson ImmunoResearch Laboratories, 115-136-072). Samples were run through the fluorescence-acti-

vated cell sorting flow cytometer BD FACSCanto II (BD Biosciences), and data were analyzed using the BD FACSDiva Software.

### In Vitro Assays of Anti-tumor Efficacy

CART19 (ARI-0001) or UT T cells were co-cultured for 16 hr, unless otherwise indicated, with tumor target cell lines (NALM6 or HL60) or primary B-ALL tumor cells, at different E:T ratios, maintaining a fixed number of target cells. Then, cells were transferred to TruCOUNT tubes (Becton Dickinson, 340334) and incubated with mAbs against human CD4, CD8, CD19 (or CD33), and 7-AAD. Cytotoxicity was determined by calculating the number of surviving target cells (identified as 7-AAD-negative and CD19- or CD33-positive cells, for NALM6 and HL60 target cells, respectively). Acquisition was stopped after a fixed number of beads was acquired and absolute cell numbers were calculated, allowing comparison between different E:T ratios. Co-culture supernatants were analyzed for cytokine production (IFN $\gamma$ , TNF- $\alpha$ , and IL-10) by ELISA, following the manufacturer's instructions (Becton Dickinson OptEIA). All experiments were run in triplicate.

ARI-0001 cell proliferation in response to CD19 antigen was measured using a CFSE assay. Briefly, ARI-0001 cells were labeled with 1  $\mu\text{M}$  CFSE, washed, and cultured with or without proliferating stimuli (IL-2 50 U/mL, NALM6 or K562 cells). NALM6 or K562 cells were added at an E:T ratio = 1:1. Assay was stopped after 96 hr and cells were stained with anti-CD4 and anti-CD8. CFSE staining was measured in CD4+ and CD8+ cells, and proliferating index (PI) was calculated (PI = sum of number of cells in different generations/calculated number of original cells).

### **In Vivo Xenograft Model of Anti-tumor Efficacy and Safety**

Animal studies were approved by CEEA-UB, the competent ethics committee for animal experimentation.

For the first experiment, 3-month-old NSG mice were infused intravenously (tail vein) with NALM6 tumor cells ( $1 \times 10^6$  cells/mice) expressing GFP and luciferase. Mice were then randomly allocated to ARI-0001 cells ( $10 \times 10^6$ /mice), UT cells ( $10 \times 10^6$  cells/mice), or vehicle.

ARI-0001 or UT cells were infused 3 days after the infusion of NALM6. Tumor growth was evaluated weekly by bioluminescence imaging (Hamamatsu detector) after the intravenous administration of D-luciferin. Mice were sacrificed at days 16–17, and tumor burden was measured in blood and bone marrow samples by flow cytometry.

The second experiment was designed to compare the two CAR19 constructs (A3B1 and FMC63). The 3-month-old NSG mice were irradiated with 2 Gy at day –8. NALM6 tumor cells ( $1 \times 10^6$  cells/mice) expressing GFP and luciferase were infused intravenously (tail vein) the following day, except in one mouse (control mouse). Tumor cells were allowed to engraft for several days. Mice were randomly allocated to NALM6 + T (n = 3), NALM6 + A3B1 (n = 4), and NALM6 + FMC63 (n = 3) groups.  $5 \times 10^6$  cells/mice were infused intravenously (UT T cells, T A3B1, or T FMC63). Bioluminescence images were taken twice a week to follow disease progression. A blood sample was taken at day 12 to measure disease burden and T cell expansion by flow cytometry. Bioluminescence images were quantified using ImageJ.

### **Patient-Scale ARI-0001 Cell Production**

Leukocytapheresis from healthy donors was obtained in the Apheresis Unit at the Hospital Clínic de Barcelona with informed consent and approved by the Ethics Committee of our hospital. Apheresis procedures were performed using the Amicus device (Fresenius Kabi, Lake Zurich, IL). A minimum of  $1 \times 10^8$  T cells diluted in 50 mL plasma was required. Cells were cultured in the CliniMACS Prodigy system (Miltenyi Biotec) using TexMACS media supplemented with 3% human AB serum and with IL-7 and IL-15 (Miltenyi Biotec 170-076-111 and 170-076-114, respectively). For T cell activation, TransACT GMP Grade (Miltenyi Biotec, 170-076-156) was used.

### **SUPPLEMENTAL INFORMATION**

Supplemental Information includes Supplemental Materials and Methods and five figures and can be found with this article online at <https://doi.org/10.1016/j.omtm.2018.11.010>.

### **AUTHOR CONTRIBUTIONS**

M. Castella and A.B. designed and performed experiments, analyzed data, and wrote the manuscript. R.M.-I., J.T., A.V., J.M.C., E.T., P.P.-G., and J. Cid supervised specific parts of the study. V.R., G.S., L.P.-A., B.M.-A., M. Caballero, B.M., J. Castaño, C.B., O.B., E.A.G.-N., and M.L. performed experiments and procedures. C.S.-P., P.E., and R.V. provided key reagents. D.B.-R., V.O.-M., T.B., E.C., and P.M. crit-

ically read and edited the manuscript. A.U.-I., J.Y., S.R., J.D., and M.J. coordinated and supervised the study.

### **CONFLICTS OF INTEREST**

S.R. declares speaker's bureau and travel expenses with the following companies: Novartis, Shire, JazzPharma, and Erytech. All other authors declare that they have no competing interests.

### **ACKNOWLEDGMENTS**

This work was mainly funded by several public grants (PI13/00676, PIE13/00033, PI17/01043, and PICIS14/00122) included in the Plan Nacional de I + D + I and co-financed by the ISCIII—Subdirección General de Evaluación y Fomento de la Investigación Sanitaria, the Fondo Europeo de Desarrollo Regional (FEDER), and the crowd-funding program Proyecto ARI. P.M. and C.B. are supported by the European Research Council (CoG-2014-646903 and PoC-2018-811220), the Spanish Ministry of Economy-Competitiveness (SAF2016), the Catalunya Government (SGR330 and PERIS 2017), the Asociación Española Contra el Cáncer (AECC), Beca FERO, and the ISCIII/FEDER (PI17/01028). P.M. also acknowledges financial support from the Obra Social La Caixa-Fundació Josep Carreras. We also want to thank the support of many people and institutions that encouraged and helped us develop this proposal in Barcelona.

### **REFERENCES**

- Brentjens, R.J., Davila, M.L., Riviere, I., Park, J., Wang, X., Cowell, L.G., Bartido, S., Stefanski, J., Taylor, C., Olszewska, M., et al. (2013). CD19-targeted T cells rapidly induce molecular remissions in adults with chemotherapy-refractory acute lymphoblastic leukemia. *Sci. Transl. Med.* 5, 177ra38.
- Brentjens, R.J., Riviere, I., Park, J.H., Davila, M.L., Wang, X., Stefanski, J., Taylor, C., Yeh, R., Bartido, S., Borquez-Ojeda, O., et al. (2011). Safety and persistence of adoptively transferred autologous CD19-targeted T cells in patients with relapsed or chemotherapy refractory B-cell leukemias. *Blood* 118, 4817–4828.
- Davila, M.L., Riviere, I., Wang, X., Bartido, S., Park, J., Curran, K., Chung, S.S., Stefanski, J., Borquez-Ojeda, O., Olszewska, M., et al. (2014). Efficacy and toxicity management of 19-28z CAR T cell therapy in B cell acute lymphoblastic leukemia. *Sci. Transl. Med.* 6, 224ra25.
- Garfall, A.L., Maus, M.V., Hwang, W.T., Lacey, S.F., Mahnke, Y.D., Melenhorst, J.J., Zheng, Z., Vogl, D.T., Cohen, A.D., Weiss, B.M., et al. (2015). Chimeric Antigen Receptor T Cells against CD19 for Multiple Myeloma. *N. Engl. J. Med.* 373, 1040–1047.
- Kochenderfer, J.N., Dudley, M.E., Kassim, S.H., Somerville, R.P., Carpenter, R.O., Stetler-Stevenson, M., Yang, J.C., Phan, G.Q., Hughes, M.S., Sherry, R.M., et al. (2015). Chemotherapy-refractory diffuse large B-cell lymphoma and indolent B-cell malignancies can be effectively treated with autologous T cells expressing an anti-CD19 chimeric antigen receptor. *J. Clin. Oncol.* 33, 540–549.
- Maude, S.L., Frey, N., Shaw, P.A., Aplenc, R., Barrett, D.M., Bunin, N.J., Chew, A., Gonzalez, V.E., Zheng, Z., Lacey, S.F., et al. (2014). Chimeric antigen receptor T cells for sustained remissions in leukemia. *N. Engl. J. Med.* 371, 1507–1517.
- Turtle, C.J., Hanafi, L.A., Berger, C., Hudecek, M., Pender, B., Robinson, E., Hawkins, R., Chaney, C., Cherian, S., Chen, X., et al. (2016). Immunotherapy of non-Hodgkin's lymphoma with a defined ratio of CD8+ and CD4+ CD19-specific chimeric antigen receptor-modified T cells. *Sci. Transl. Med.* 8, 355ra116.
- Wang, X., Popplewell, L.L., Wagner, J.R., Naranjo, A., Blanchard, M.S., Mott, M.R., Norris, A.P., Wong, C.W., Urak, R.Z., Chang, W.C., et al. (2016). Phase 1 studies of central memory-derived CD19 CAR T-cell therapy following autologous HSCT in patients with B-cell NHL. *Blood* 127, 2980–2990.

9. Barrett, D.M., Singh, N., Porter, D.L., Grupp, S.A., and June, C.H. (2014). Chimeric antigen receptor therapy for cancer. *Annu. Rev. Med.* 65, 333–347.
10. Chang, Z.L., and Chen, Y.Y. (2017). CARs: Synthetic Immunoreceptors for Cancer Therapy and Beyond. *Trends Mol. Med.* 23, 430–450.
11. Kochenderfer, J.N., Feldman, S.A., Zhao, Y., Xu, H., Black, M.A., Morgan, R.A., Wilson, W.H., and Rosenberg, S.A. (2009). Construction and preclinical evaluation of an anti-CD19 chimeric antigen receptor. *J. Immunother.* 32, 689–702.
12. Sadelain, M. (2015). CAR therapy: the CD19 paradigm. *J. Clin. Invest.* 125, 3392–3400.
13. Lorentzen, C.L., and Straten, P.T. (2015). CD19-Chimeric Antigen Receptor T Cells for Treatment of Chronic Lymphocytic Leukaemia and Acute Lymphoblastic Leukaemia. *Scand. J. Immunol.* 82, 307–319.
14. Hay, K.A., Hanafi, L.A., Li, D., Gust, J., Liles, W.C., Wurfel, M.M., López, J.A., Chen, J., Chung, D., Harju-Baker, S., et al. (2017). Kinetics and biomarkers of severe cytokine release syndrome after CD19 chimeric antigen receptor-modified T-cell therapy. *Blood* 130, 2295–2306.
15. Armengol, M.P., Juan, M., Lucas-Martín, A., Fernández-Figueras, M.T., Jaraquemada, D., Gallart, T., and Pujol-Borrell, R. (2001). Thyroid autoimmune disease: demonstration of thyroid antigen-specific B cells and recombination-activating gene expression in chemokine-containing active intrathyroidal germinal centers. *Am. J. Pathol.* 159, 861–873.
16. Hoffmann, J.M., Schubert, M.L., Wang, L., Hüchelhoven, A., Sellner, L., Stock, S., Schmitt, A., Kleist, C., Gern, U., Loskog, A., et al. (2018). Differences in Expansion Potential of Naive Chimeric Antigen Receptor T Cells from Healthy Donors and Untreated Chronic Lymphocytic Leukemia Patients. *Front. Immunol.* 8, 1956.
17. Milone, M.C., Fish, J.D., Carpenito, C., Carroll, R.G., Binder, G.K., Teachey, D., Samanta, M., Lakhali, M., Gloss, B., Danet-Desnoyers, G., et al. (2009). Chimeric receptors containing CD137 signal transduction domains mediate enhanced survival of T cells and increased antileukemic efficacy in vivo. *Mol. Ther.* 17, 1453–1464.
18. Grupp, S.A., Kalos, M., Barrett, D., Aplenc, R., Porter, D.L., Rheingold, S.R., Teachey, D.T., Chew, A., Hauck, B., Wright, J.F., et al. (2013). Chimeric antigen receptor-modified T cells for acute lymphoid leukemia. *N. Engl. J. Med.* 368, 1509–1518.
19. Zhou, L.J. (1995). CD19 workshop panel report. In *Leucocyte Typing V: White Cell Differentiation Antigens*, S.F. Schlossman, L. Boumsell, W. Gilks, J.M. Harlan, T. Kishimoto, C. Morimoto, J. Ritz, S. Shaw, R. Silverstein, T. Springer, T. Tedder, and R. Todd, eds. (Oxford University Press), pp. 507–509.
20. Dull, T., Zufferey, R., Kelly, M., Mandel, R.J., Nguyen, M., Trono, D., and Naldini, L. (1998). A third-generation lentivirus vector with a conditional packaging system. *J. Virol.* 72, 8463–8471.
21. Zufferey, R., Dull, T., Mandel, R.J., Bukovsky, A., Quiroz, D., Naldini, L., and Trono, D. (1998). Self-inactivating lentivirus vector for safe and efficient in vivo gene delivery. *J. Virol.* 72, 9873–9880.
22. Montini, E., Cesana, D., Schmidt, M., Sanvito, F., Bartholomae, C.C., Ranzani, M., Benedicenti, F., Sergi, L.S., Ambrosi, A., Ponzoni, M., et al. (2009). The genotoxic potential of retroviral vectors is strongly modulated by vector design and integration site selection in a mouse model of HSC gene therapy. *J. Clin. Invest.* 119, 964–975.
23. Wang, X., and Rivière, I. (2015). Manufacture of tumor- and virus-specific T lymphocytes for adoptive cell therapies. *Cancer Gene Ther.* 22, 85–94.
24. Ausubel, L.J., Hall, C., Sharma, A., Shakeley, R., Lopez, P., Quezada, V., Couture, S., Laderman, K., McMahon, R., Huang, P., et al. (2012). Production of CGMP-Grade Lentiviral Vectors. *Bioprocess Int.* 10, 32–43.
25. Merten, O.W., Hebben, M., and Bovolenta, C. (2016). Production of lentiviral vectors. *Mol. Ther. Methods Clin. Dev.* 3, 16017.
26. Durocher, Y., Perret, S., and Kamen, A. (2002). High-level and high-throughput recombinant protein production by transient transfection of suspension-growing human 293-EBNA1 cells. *Nucleic Acids Res.* 30, E9.
27. Tom, R., Bisson, L., and Durocher, Y. (2008). Transfection of HEK293-EBNA1 Cells in Suspension with Linear PEI for Production of Recombinant Proteins. *CSH Protoc.* 2008, pdb.prot4977.
28. Wang, X., and Rivière, I. (2016). Clinical manufacturing of CAR T cells: foundation of a promising therapy. *Mol. Ther. Oncolytics* 3, 16015.
29. Kaiser, A.D., Assenmacher, M., Schröder, B., Meyer, M., Orentas, R., Bethke, U., and Dropulic, B. (2015). Towards a commercial process for the manufacture of genetically modified T cells for therapy. *Cancer Gene Ther.* 22, 72–78.
30. Hollyman, D., Stefanski, J., Przybylowski, M., Bartido, S., Borquez-Ojeda, O., Taylor, C., Yeh, R., Capacio, V., Olszewska, M., Hosey, J., et al. (2009). Manufacturing validation of biologically functional T cells targeted to CD19 antigen for autologous adoptive cell therapy. *J. Immunother.* 32, 169–180.
31. Massaguer, A., Engel, P., Pérez-del-Pulgar, S., Bosch, J., and Pizcueta, P. (2000). Production and characterization of monoclonal antibodies against conserved epitopes of P-selectin (CD62P). *Tissue Antigens* 56, 117–128.
32. Romero, X., Zapater, N., Calvo, M., Kalko, S.G., de la Fuente, M.A., Tovar, V., Ockeloen, C., Pizcueta, P., and Engel, P. (2005). CD229 (Ly9) lymphocyte cell surface receptor interacts homophilically through its N-terminal domain and relocates to the immunological synapse. *J. Immunol.* 174, 7033–7042.
33. June, C.H., Levine, B.L., Porter, D.L., Kalos, M.D., and Milone, M.C. September 2011. Use of chimeric antigen receptor-modified T cells to treat cancer. U.S. patent WO201/207/9000.

## **Supplemental Information**

### **Development of a Novel Anti-CD19 Chimeric**

### **Antigen Receptor: A Paradigm for an Affordable**

### **CAR T Cell Production at Academic Institutions**

**Maria Castella, Anna Boronat, Raquel Martín-Ibáñez, Vanina Rodríguez, Guillermo Suñé, Miguel Caballero, Berta Marzal, Lorena Pérez-Amill, Beatriz Martín-Antonio, Julio Castaño, Clara Bueno, Olga Balagué, Europa Azucena González-Navarro, Carles Serra-Pages, Pablo Engel, Ramon Vilella, Daniel Benitez-Ribas, Valentín Ortiz-Maldonado, Joan Cid, Jaime Tabera, Josep M. Canals, Miquel Lozano, Tycho Baumann, Anna Vilarrodona, Esteve Trias, Elías Campo, Pablo Menendez, Álvaro Urbano-Ispizua, Jordi Yagüe, Patricia Pérez-Galán, Susana Rives, Julio Delgado, and Manel Juan**



# Supplemental information

1. Supplemental figures
2. Supplemental Materials and methods

## 1. Supplemental figures

Figure S1. Anti-CD19 A3B1 antibody validation

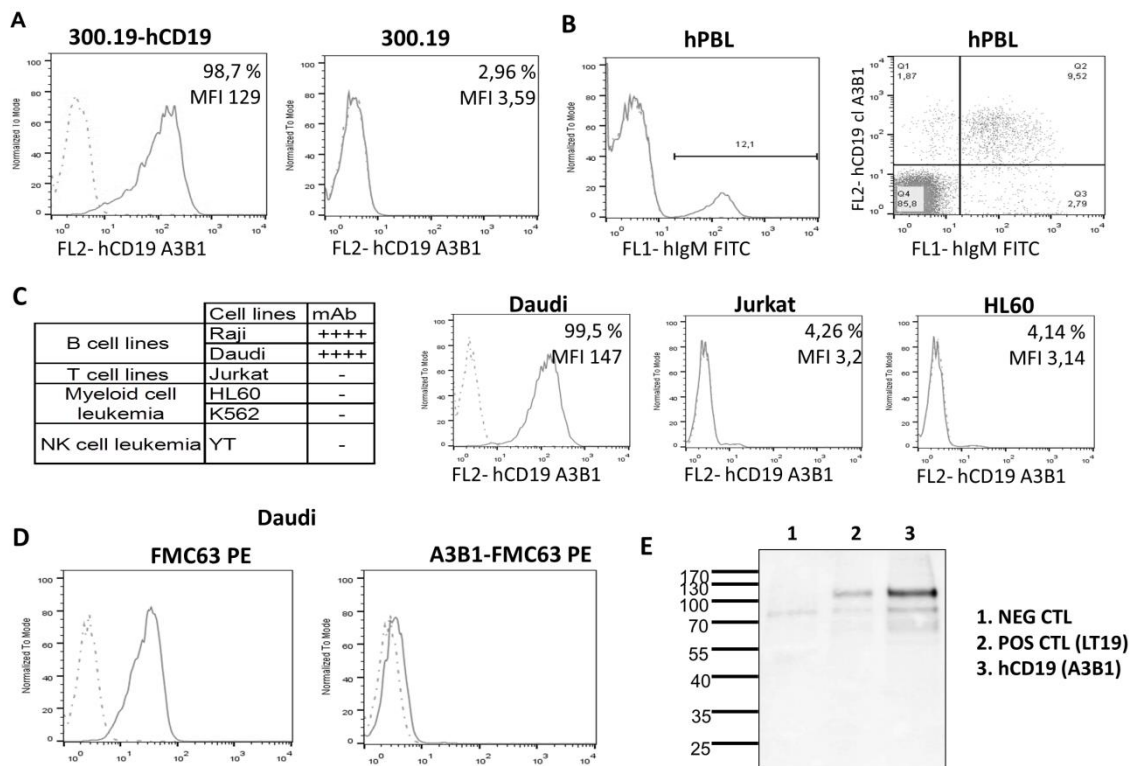

(A) Reactivity of mAb A3B1 with 300.19-hCD19 stable transfected cells and 300.19 untransfected cells. (B) Reactivity of mAb A3B1 with peripheral blood B cells, single staining and double staining with IgM. (C) Reactivity of mAb A3B1 with different hematopoietic cell lines: summary table (- = less than 20% positive cells; ++++ more than 90% of positive cells, and representative flow cytometry histograms with Daudi (B cell lines), Jurkat (T cell lines) and HL60 (myeloid cell lines). (D) Ability of mAb A3B1 to block the binding of CD19 FMC63 labeled antibody to DAUDI cell line, (E) Immunoprecipitation with mAb A3B1 from Daudi cell line.

**Figure S2. *In vitro* evaluation of ARI-0001 cell cytotoxic activity**

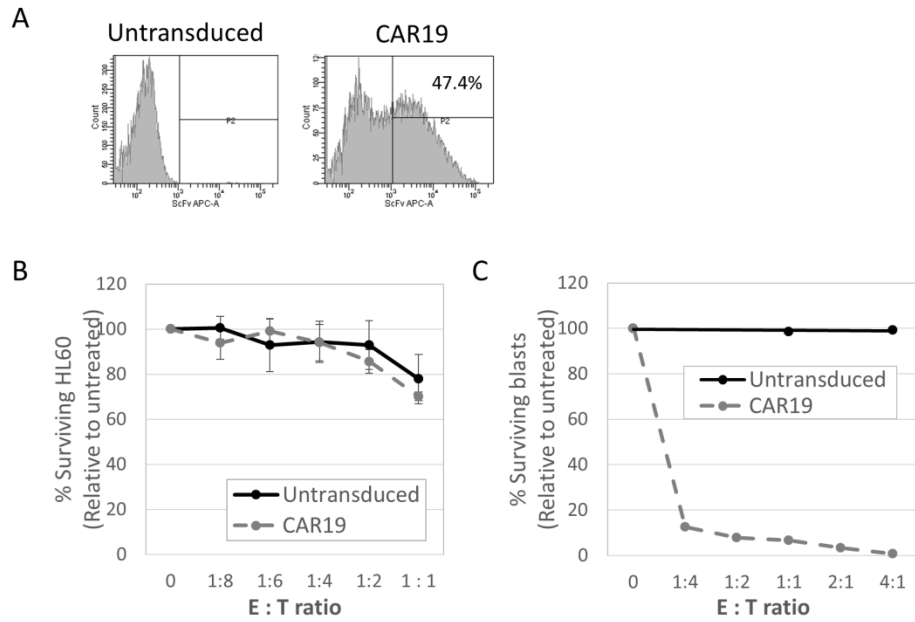

(A) Detection of CAR19 expression in T cells by flow cytometry. (B) Cytotoxicity assay of CART19 cells vs HL60 cells (CD19-) at 16h time-point. Percent target surviving cells, relative to untreated, is shown (Mean of 3 experiments  $\pm$  SEM). (C) Cytotoxicity assay of CART19 cells vs a primary B-ALL at 16h time-point.

**Figure S3. *In vitro* cytotoxicity assay – Flow cytometry gating strategy**

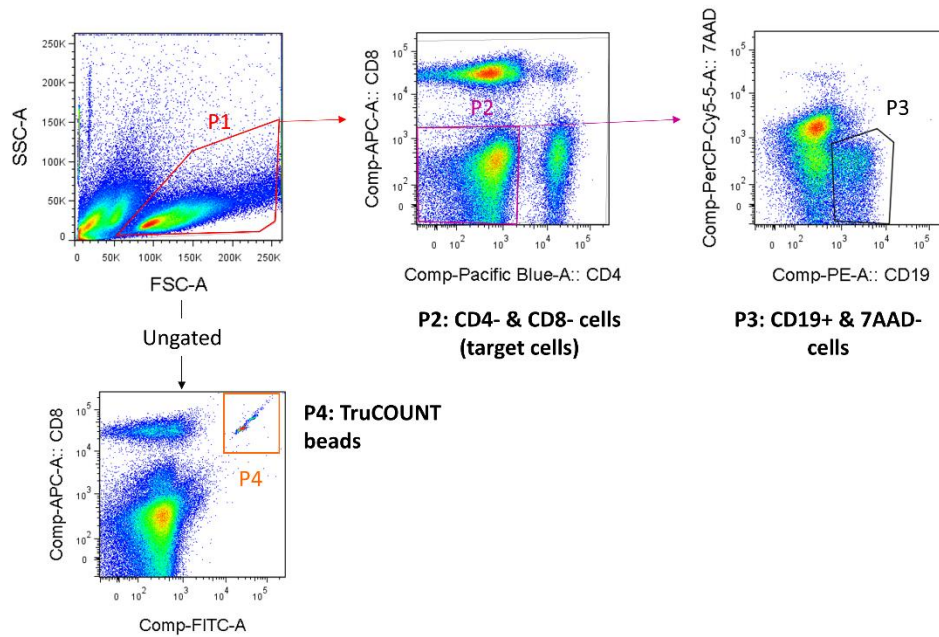

Flow cytometry gating strategy shown on a representative sample. Normal shaped cells are selected using P1 gate. To select target cells (NALM6) two consecutive gates are used. First, T cells are excluded first by gating CD4- and CD8- cells (P2). Then, alive NALM6 cells are selected by gating CD19+ and 7AAD- cells (P3). TruCOUNT beads are selected from ungated population (P4).

Figure S4. Quantification of tumor burden by bioluminescent imaging in a NALM6 xenograft mouse model, following T cell administration (Untransduced T cells, A3B1 or FMC63 CAR T cells).

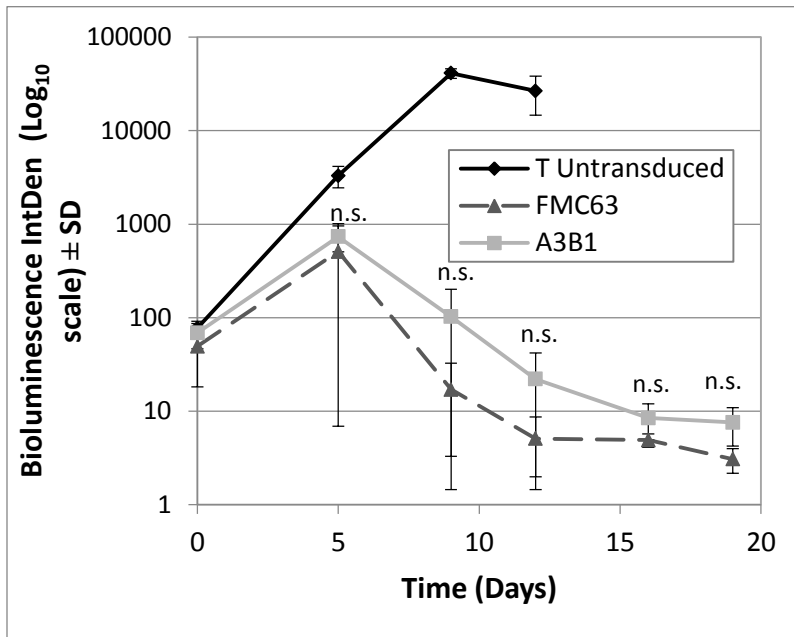

Bioluminescent signal from each mouse at the different time points was quantified using Image J. Graphic shows how tumor signal increases in the T untransduced group and decreases in the CAR T cell treated groups. Mean IntDen $\pm$ SD is shown. n.s. indicates no statistical difference between FMC63 and A3B1 groups..



Figure S5. Cytotoxic activity of ARI-0001 cell products produced with CliniMACS Prodigy.

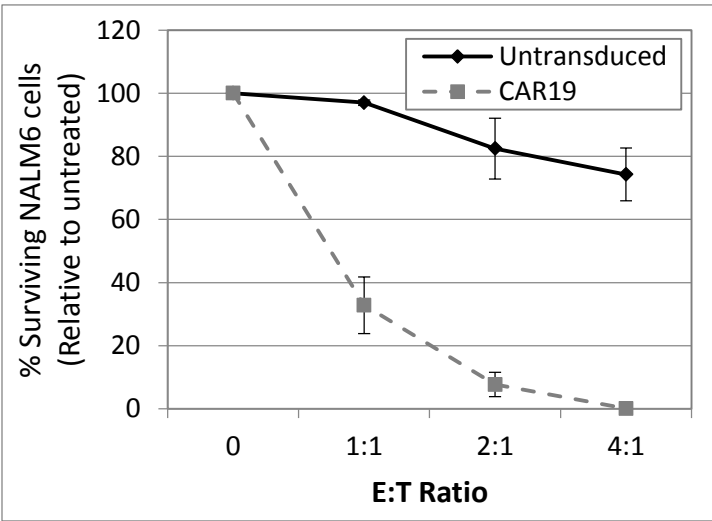

Cytotoxicity assay of ARI-0001 cell products produced with CliniMACS Prodigy, at 4h time-point. Percent target surviving cells, relative to untreated, is shown (Mean of 3 experiments  $\pm$  SEM).

## 2. Supplemental Materials and methods

### Immunoprecipitation and Western Blotting

Immunoprecipitation was performed as described in [19]. For regular western blotting, cells were lysed in 0.05 M Tris-HCl (pH 6.8), 2% SDS, 6%  $\beta$ -mercaptoethanol and boiled for 5min. SDS-PAGE electrophoresis was done using 12% acrylamide gels. Proteins were transferred to a PVDF membrane. Primary antibodies anti-CD3z (Santa Cruz Biotech, sc-166435) and anti-Vinculin (Abcam, ab129002) were diluted in blocking buffer (5% milk in TBS-Tween 20) and incubated overnight. Horseradish peroxidase—conjugated anti-mouse (Abcam) and anti-rabbit IgG (Cell Signalling) were used as secondary antibodies. Images were acquired using ImageQuant LAS4000 mini system (GE Healthcare).

### Determination of number of transgene copies/cell

Number of transgene copies/cell was determined by quantitative real-time PCR, using Light Cycler® 480 SYBRGreen® I Master (Roche, Cat. N. 04707516001). Pairs of primers were designed against the GATA2 gene (control) and WPRE sequence (part of the transgene).

Primer sequences are as follows: GATA2\_F: 5'tggcgcacaactacatggaa 3'; GATA2\_R: 5'cgagtcgaggtgattgaagaaga 3'; WPRE\_F: 5'gtcctttccatggctgctc 3'; WPRE\_R: 5'ccgaagggacgtagcaga 3'. Absolute quantification method was used to determine copy number. Standard curves were prepared using 1:10 serial dilutions of plasmids containing GATA2 or transgene. Final number of molecules in the reaction ranged from  $10^8$  to  $10^2$  molecules. For GATA2 quantification, GATA2 cDNA was cloned in a pCRII-Topo vector (Invitrogen). pCCL-CAR19 vector was used in the same way to quantify transgene copy number. The following PCR program was used: 1) Initial denaturalization: 95°C, 5'; 2) 40 cycles of: 95°C, 10"; 58°C, 10"; 72°C, 5"; 3) Melting curve.

### Detection of replication-competent lentivirus (RCL)

Presence of RCLs was evaluated using detection of VSV-G DNA in the final product as proposed by Sastry *et al.* 2003 [20]. Absolute quantification by real-time PCR using Light Cycler 480 SYBRGreen I Master was also used in this case. Primers used to detect VSV-G sequence are: VSVG-F: 5'tgcaaggaaagcattgaacaa 3' and VSVG-R: 5'gaggagtcacctggacaatcact 3'. The same quantification method and PCR program as for determination of transgene copies/cell was used.

### Statistical analysis

Unless otherwise indicated, results are expressed as mean standard deviation of three independent experiments. P-values were determined by paired t test (when comparing two groups).
